# Supplementary material
Source: PubMed Central journal article supplement (PMC8252723)
Supplement: mmc1.pdf [file mmc1.pdf]

## Appendix A. Response tables

The pairwise comparison (Best to others, i.e.,  $o_{Bj}$  and Others to worst, i.e.,  $o_{jW}$ ) tables of health workers, Social workers, Academicians, and Common citizens.

| DMs | Strategies | Comparison  | ST1      | ST2 | ST3 | ST4 | ST5 | ST6 | ST7 | ST8 | ST9 | ST10 |   |
|-----|------------|-------------|----------|-----|-----|-----|-----|-----|-----|-----|-----|------|---|
| DM1 | Best       | <b>ST1</b>  | $o_{Bj}$ | 1   | 3   | 2   | 4   | 7   | 7   | 5   | 8   | 5    | 9 |
|     | Worst      | <b>ST10</b> | $o_{jW}$ | 9   | 7   | 5   | 4   | 3   | 4   | 5   | 3   | 5    | 1 |
| DM2 | Best       | <b>ST2</b>  | $o_{Bj}$ | 3   | 1   | 4   | 9   | 9   | 9   | 5   | 9   | 7    | 7 |
|     | Worst      | <b>ST8</b>  | $o_{jW}$ | 9   | 9   | 6   | 5   | 5   | 5   | 4   | 1   | 4    | 5 |
| DM3 | Best       | <b>ST2</b>  | $o_{Bj}$ | 3   | 1   | 5   | 7   | 5   | 8   | 4   | 7   | 5    | 8 |
|     | Worst      | <b>ST10</b> | $o_{jW}$ | 7   | 9   | 7   | 4   | 5   | 5   | 3   | 3   | 3    | 1 |
| DM4 | Best       | <b>ST2</b>  | $o_{Bj}$ | 5   | 1   | 5   | 9   | 9   | 5   | 3   | 6   | 7    | 9 |
|     | Worst      | <b>ST10</b> | $o_{jW}$ | 7   | 8   | 3   | 5   | 3   | 3   | 7   | 3   | 4    | 1 |
| DM5 | Best       | <b>ST7</b>  | $o_{Bj}$ | 3   | 3   | 3   | 5   | 7   | 2   | 1   | 8   | 7    | 1 |
|     | Worst      | <b>ST9</b>  | $o_{jW}$ | 8   | 7   | 4   | 1   | 2   | 6   | 9   | 4   | 1    | 5 |

Table A.9: Preference Comparisons by Health-workers

| DMs  | Strategies | Comparison  | ST1      | ST2 | ST3 | ST4 | ST5 | ST6 | ST7 | ST8 | ST9 | ST10 |   |
|------|------------|-------------|----------|-----|-----|-----|-----|-----|-----|-----|-----|------|---|
| DM6  | Best       | <b>ST1</b>  | $o_{Bj}$ | 1   | 3   | 5   | 5   | 7   | 8   | 3   | 3   | 8    | 9 |
|      | Worst      | <b>ST10</b> | $o_{jW}$ | 9   | 7   | 5   | 4   | 3   | 7   | 9   | 5   | 1    | 1 |
| DM7  | Best       | <b>ST6</b>  | $o_{Bj}$ | 3   | 2   | 3   | 6   | 6   | 1   | 2   | 5   | 9    | 7 |
|      | Worst      | <b>ST9</b>  | $o_{jW}$ | 8   | 8   | 7   | 5   | 2   | 9   | 7   | 5   | 1    | 3 |
| DM8  | Best       | <b>ST7</b>  | $o_{Bj}$ | 2   | 4   | 5   | 5   | 7   | 5   | 1   | 8   | 7    | 8 |
|      | Worst      | <b>ST8</b>  | $o_{jW}$ | 9   | 7   | 5   | 7   | 3   | 7   | 9   | 1   | 3    | 2 |
| DM9  | Best       | <b>ST7</b>  | $o_{Bj}$ | 3   | 3   | 5   | 4   | 8   | 5   | 1   | 7   | 9    | 9 |
|      | Worst      | <b>ST9</b>  | $o_{jW}$ | 7   | 5   | 5   | 5   | 1   | 5   | 8   | 3   | 1    | 1 |
| DM10 | Best       | <b>ST7</b>  | $o_{Bj}$ | 1   | 1   | 2   | 9   | 9   | 6   | 1   | 5   | 9    | 7 |
|      | Worst      | <b>ST9</b>  | $o_{jW}$ | 7   | 6   | 6   | 3   | 3   | 3   | 9   | 4   | 1    | 3 |

Table A.10: Preference Comparisons by Social Workers

| DMs  | Strategies | Comparison  | ST1      | ST2 | ST3 | ST4 | ST5 | ST6 | ST7 | ST8 | ST9 | ST10 |   |
|------|------------|-------------|----------|-----|-----|-----|-----|-----|-----|-----|-----|------|---|
| DM11 | Best       | <b>ST1</b>  | $o_{Bj}$ | 1   | 4   | 5   | 5   | 7   | 8   | 3   | 3   | 9    | 7 |
|      | Worst      | <b>ST9</b>  | $o_{jW}$ | 9   | 7   | 5   | 6   | 3   | 7   | 7   | 5   | 1    | 3 |
| DM12 | Best       | <b>ST1</b>  | $o_{Bj}$ | 1   | 3   | 3   | 6   | 6   | 7   | 5   | 5   | 9    | 9 |
|      | Worst      | <b>ST10</b> | $o_{jW}$ | 8   | 8   | 7   | 5   | 2   | 6   | 7   | 5   | 2    | 1 |
| DM13 | Best       | <b>ST1</b>  | $o_{Bj}$ | 1   | 3   | 5   | 5   | 7   | 7   | 3   | 8   | 7    | 8 |
|      | Worst      | <b>ST8</b>  | $o_{jW}$ | 9   | 7   | 5   | 7   | 3   | 7   | 6   | 1   | 4    | 4 |
| DM14 | Best       | <b>ST2</b>  | $o_{Bj}$ | 3   | 1   | 5   | 4   | 8   | 5   | 3   | 6   | 8    | 9 |
|      | Worst      | <b>ST10</b> | $o_{jW}$ | 9   | 5   | 5   | 5   | 1   | 5   | 7   | 3   | 3    | 1 |
| DM15 | Best       | <b>ST1</b>  | $o_{Bj}$ | 1   | 5   | 2   | 9   | 9   | 8   | 1   | 3   | 5    | 8 |
|      | Worst      | <b>ST4</b>  | $o_{jW}$ | 8   | 6   | 6   | 1   | 3   | 3   | 5   | 4   | 3    | 3 |

Table A.11: Preference Comparisons by Academicians

| DMs  | Strategies | Comparison  | ST1      | ST2 | ST3 | ST4 | ST5 | ST6 | ST7 | ST8 | ST9 | ST10 |   |
|------|------------|-------------|----------|-----|-----|-----|-----|-----|-----|-----|-----|------|---|
| DM16 | Best       | <b>ST1</b>  | $o_{Bj}$ | 1   | 3   | 5   | 4   | 5   | 5   | 3   | 5   | 5    | 9 |
|      | Worst      | <b>ST10</b> | $o_{jW}$ | 9   | 7   | 7   | 3   | 3   | 5   | 8   | 7   | 3    | 1 |
| DM17 | Best       | <b>ST1</b>  | $o_{Bj}$ | 1   | 3   | 5   | 7   | 5   | 5   | 4   | 7   | 5    | 9 |
|      | Worst      | <b>ST10</b> | $o_{jW}$ | 9   | 7   | 5   | 5   | 2   | 5   | 7   | 6   | 3    | 1 |
| DM18 | Best       | <b>ST1</b>  | $o_{Bj}$ | 1   | 4   | 4   | 7   | 9   | 9   | 5   | 7   | 9    | 7 |
|      | Worst      | <b>ST9</b>  | $o_{jW}$ | 9   | 8   | 7   | 5   | 2   | 3   | 5   | 3   | 1    | 3 |
| DM19 | Best       | <b>ST1</b>  | $o_{Bj}$ | 1   | 5   | 5   | 5   | 7   | 7   | 3   | 5   | 3    | 9 |
|      | Worst      | <b>ST10</b> | $o_{jW}$ | 9   | 9   | 4   | 3   | 3   | 3   | 5   | 7   | 4    | 1 |
| DM20 | Best       | <b>ST1</b>  | $o_{Bj}$ | 1   | 2   | 3   | 5   | 9   | 5   | 3   | 4   | 3    | 9 |
|      | Worst      | <b>ST10</b> | $o_{jW}$ | 9   | 7   | 5   | 4   | 3   | 5   | 5   | 3   | 3    | 1 |

Table A.12: Preference Comparisons by Common citizens

## Appendix B. Mathematical formulation of models:

### Model for Health workers:

$$\text{Min } \xi \tag{B.1}$$

subject to,

$$\xi \geq \xi_k \quad \forall k \in D_1 = \{1, 2, 3, 4, 5\} \tag{B.2}$$

$$W_B - W_j \times o_{Bj} \leq \xi_k, \quad W_B - W_j \times o_{Bj} \geq -\xi_k, \quad \forall j \in J, k \in D_1 \tag{B.3}$$

$$W_j - W_W \times o_{jW} \leq \xi_k, \quad W_j - W_W \times o_{jW} \geq -\xi_k, \quad \forall j \in J, k \in D_1 \tag{B.4}$$

$$\sum_j W_j = 1, \quad W_j \geq 0, \quad \forall j \in J \tag{B.5}$$

$$\xi_k \geq 0, \quad \forall k \in D_1. \tag{B.6}$$

$$\tag{B.7}$$

**Model for Social workers:**

$$\text{Min } \xi \tag{B.8}$$

subject to,

$$\xi \geq \xi_k \quad \forall k \in D_2 = \{6, 7, 8, 9, 10\} \tag{B.9}$$

$$W_B - W_j \times o_{Bj} \leq \xi_k, \quad W_B - W_j \times o_{Bj} \geq -\xi_k, \quad \forall j \in J, k \in D_2 \tag{B.10}$$

$$W_j - W_W \times o_{jW} \leq \xi_k, \quad W_j - W_W \times o_{jW} \geq -\xi_k, \quad \forall j \in J, k \in D_2 \tag{B.11}$$

$$\sum_j W_j = 1, \quad W_j \geq 0, \quad \forall j \in J \tag{B.12}$$

$$\xi_k \geq 0, \quad \forall k \in D_2. \tag{B.13}$$

$$\tag{B.14}$$

**Model for Academicians:**

$$\text{Min } \xi \tag{B.15}$$

subject to,

$$\xi \geq \xi_k \quad \forall k \in D_3 = \{11, 12, 13, 14, 15\} \tag{B.16}$$

$$W_B - W_j \times o_{Bj} \leq \xi_k, \quad W_B - W_j \times o_{Bj} \geq -\xi_k, \quad \forall j \in J, k \in D_3 \tag{B.17}$$

$$W_j - W_W \times o_{jW} \leq \xi_k, \quad W_j - W_W \times o_{jW} \geq -\xi_k, \quad \forall j \in J, k \in D_3 \tag{B.18}$$

$$\sum_j W_j = 1, \quad W_j \geq 0, \quad \forall j \in J \tag{B.19}$$

$$\xi_k \geq 0, \quad \forall k \in D_3. \tag{B.20}$$

$$\tag{B.21}$$

**Model for Common citizens (Others):**

$$\text{Min } \xi \tag{B.22}$$

subject to,

$$\xi \geq \xi_k \quad \forall k \in D_4 = \{16, 17, 18, 19, 20\} \tag{B.23}$$

$$W_B - W_j \times o_{Bj} \leq \xi_k, \quad W_B - W_j \times o_{Bj} \geq -\xi_k, \quad \forall j \in J, k \in D_4 \tag{B.24}$$

$$W_j - W_W \times o_{jW} \leq \xi_k, \quad W_j - W_W \times o_{jW} \geq -\xi_k, \quad \forall j \in J, k \in D_4 \tag{B.25}$$

$$\sum_j W_j = 1, \quad W_j \geq 0, \quad \forall j \in J \tag{B.26}$$

$$\xi_k \geq 0, \quad \forall k \in D_4. \tag{B.27}$$

$$\tag{B.28}$$

## Appendix B.

| Section 1       |                      |
|-----------------|----------------------|
| Name (Optional) | <input type="text"/> |
| Gender          | <input type="text"/> |
| Education       | <input type="text"/> |
| Email Address   | <input type="text"/> |
| Current City    | <input type="text"/> |
| Country         | <input type="text"/> |
| Profession      | <input type="text"/> |
| Experience      | <input type="text"/> |

| Section 2                                                                                                                                                                                                                                                                                                                                                                                                                                                                                                                                                                                                                                                                                                                                                                                                                                                                         |                                                                                                                                                               |
|-----------------------------------------------------------------------------------------------------------------------------------------------------------------------------------------------------------------------------------------------------------------------------------------------------------------------------------------------------------------------------------------------------------------------------------------------------------------------------------------------------------------------------------------------------------------------------------------------------------------------------------------------------------------------------------------------------------------------------------------------------------------------------------------------------------------------------------------------------------------------------------|---------------------------------------------------------------------------------------------------------------------------------------------------------------|
| <b>Q 1.</b>                                                                                                                                                                                                                                                                                                                                                                                                                                                                                                                                                                                                                                                                                                                                                                                                                                                                       | On a scale of 1 to 5 (where 1 being the least and 5 being the highest), how dangerous do you think is the Novel Corona Virus Epidemic (COVID-19) for mankind? |
| <b>Less Impact ---</b> <input type="radio"/> 1 <input type="radio"/> 2 <input type="radio"/> 3 <input type="radio"/> 4 <input type="radio"/> 5 <b>--- High Impact</b>                                                                                                                                                                                                                                                                                                                                                                                                                                                                                                                                                                                                                                                                                                             |                                                                                                                                                               |
| <b>Q 2.</b>                                                                                                                                                                                                                                                                                                                                                                                                                                                                                                                                                                                                                                                                                                                                                                                                                                                                       | As an expert, please select the most challenging area for authorities to control outbreak of COVID-19.                                                        |
| <input type="radio"/> Practicing Social Distancing<br><input type="radio"/> Availability of Man Power, ventilators and protective equipment in hospitals<br><input type="radio"/> Controlling Prices and ensuring delivery/availability of foods and medicines<br><input type="radio"/> Financial support to daily wagers or unemployed<br><input type="radio"/> Timely providing right information to public for awareness and precautions<br><input type="radio"/> Precisely measure the overall impact of COVID-19<br><input type="radio"/> Complete lockdown for a suitable time period<br><input type="radio"/> Digital Surveillance of Infected/Doubtful People and their movement in community<br><input type="radio"/> Ensuring smooth functioning of economic growth engine<br><input type="radio"/> Support to Banks, Startups and MSMEs                                |                                                                                                                                                               |
| <b>Q 3.</b>                                                                                                                                                                                                                                                                                                                                                                                                                                                                                                                                                                                                                                                                                                                                                                                                                                                                       | Reasons for selecting the most challenging area in Q2. (you can select multiple options)                                                                      |
| <input type="checkbox"/> Survival of humanity is top-most priority<br><input type="checkbox"/> Feeding the poor and needy is very important<br><input type="checkbox"/> Readiness of hospitals and health centers very important<br><input type="checkbox"/> Checking against hoarding is important<br><input type="checkbox"/> Providing right information is very important to control panicking and fake news<br><input type="checkbox"/> Measuring the impact is very important to decide further steps<br><input type="checkbox"/> Complete lockdown is the only option to control community spread<br><input type="checkbox"/> In a large country, digital surveillance is the only option<br><input type="checkbox"/> Businesses and other economic activities must go on for the country to run<br><input type="checkbox"/> Any other please specify <input type="text"/> |                                                                                                                                                               |
| <p>This section consists of identified challenges and strategies that could directly impact to tackle the Covid-19 outbreak.</p> <p>Please follow the given Likert scale to rate the identified challenges and strategies based on your understanding and experience.</p> <p>Note: The goal of this survey is to get the response whether you consider given factors as challenging to</p>                                                                                                                                                                                                                                                                                                                                                                                                                                                                                        |                                                                                                                                                               |

|             |                                                                                                                                                                                                 |                       |                       |                       |                       |                       |                       |                       |                       |                       |
|-------------|-------------------------------------------------------------------------------------------------------------------------------------------------------------------------------------------------|-----------------------|-----------------------|-----------------------|-----------------------|-----------------------|-----------------------|-----------------------|-----------------------|-----------------------|
|             | tackle the Covid-19 or you disagree with them. Moreover, you can opt the intermediate category if you have doubt between the relationships of their importance.                                 |                       |                       |                       |                       |                       |                       |                       |                       |                       |
|             | EI = Equally Important, IEM = Intermediate, MI = Moderately Important, IMI = Intermediate, I = Important, IVI = Intermediate, VI = Very Important, IVE = Intermediate, EI = Extremely Important |                       |                       |                       |                       |                       |                       |                       |                       |                       |
| <b>Q 4.</b> | Please rate importance of the most challenging area selected in Q2 in comparison with other challenging areas. (Keep equal important while comparing most challenging area).                    | EI                    | IEM                   | MI                    | IMI                   | IM                    | IVI                   | VI                    | IVE                   | EI                    |
| <b>1</b>    | Practicing Social Distancing                                                                                                                                                                    | <input type="radio"/> |
| <b>2</b>    | Availability of Man Power, ventilators and protective equipment in hospitals                                                                                                                    | <input type="radio"/> |
| <b>3</b>    | Controlling Prices and ensuring delivery/availability of foods and medicines                                                                                                                    | <input type="radio"/> |
| <b>4</b>    | Financial support to daily wagers or unemployed                                                                                                                                                 | <input type="radio"/> |
| <b>5</b>    | Timely providing right information to public for awareness and precautions                                                                                                                      | <input type="radio"/> |
| <b>6</b>    | Precisely measure the overall impact of COVID-19                                                                                                                                                | <input type="radio"/> |
| <b>7</b>    | Complete lockdown for a suitable time period                                                                                                                                                    | <input type="radio"/> |
| <b>8</b>    | Digital Surveillance of Infected/Doubtful People and their movement in community                                                                                                                | <input type="radio"/> |
| <b>9</b>    | Ensuring smooth functioning of economic growth engine                                                                                                                                           | <input type="radio"/> |
| <b>10</b>   | Support to Banks, Startups and MSMEs                                                                                                                                                            | <input type="radio"/> |

### Section 3

**Q 5.** As an expert, please select the least challenging area for authorities to control outbreak of COVID-19. (Please select the option which is different from the most challenging area chosen in Q2).

- Financial support to daily wagers or unemployed
- Timely providing right information to public for awareness and precautions
- Precisely measure the overall impact of COVID-19
- Complete lockdown for a suitable time period
- Digital Surveillance of Infected/Doubtful People and their movement in community
- Practicing Social Distancing
- Support to Banks, Startups and MSMEs
- Ensuring smooth functioning of economic growth engine
- Availability of Man Power, ventilators and protective equipment in hospitals
- Controlling Prices and ensuring delivery/availability of foods and medicines

**Q 6.** Reasons for selecting the least challenging area in Q5. (you can select multiple options)

- Feeding the poor and needy is very important
- Checking against hoarding is important
- Providing right information is very important to check and panicking and fake news
- Measuring the impact is very important to decide further steps
- In a large country, digital surveillance is the only option
- Businesses and other economic activities must go on for the country to run
- Survival of humanity is top-most priority
- Readiness of hospitals and health centers very important
- Complete lockdown is the only option to control community spread
- Any other please specify
